# Supplementary material
Source: PubMed Central journal article supplement (PMC3167548)
Supplement: 1015946108_pnas.201015946SI.pdf [file 1015946108_pnas.201015946SI.pdf]

# Supporting Information

Samia et al. 10.1073/pnas.1015946108

## SI Text

**Data.** Our wildlife reservoir data are from the PreBalkhash plague focus of southeastern Kazakhstan (74–78°E and 44–47°N). Each spring (May and June) and autumn (September and October) during the period 1949–1995, gerbil density estimates, together with flea counts, were done on a number (1–78, median = 54) of different squares in a 20 × 20-km grid (1). The consistency of these data is indeed very high, because they were obtained through a rather strict regime. Kazakhstan is the last Soviet Republic that declared independence (December 16, 1991). Moreover, Kazakhstan enjoys relatively stable political and socioeconomic developments since independence (2). Because the host densities are spatially autocorrelated over large areas, most likely through large-scale climate forcing (3), we suspect that the monitoring data from the PreBalkhash focus capture essential variation over much of Kazakhstan. By developing a series of statistical models, we find support for this view, because we find a clear correspondence between the plague/host dynamics of the PreBalkhash focus and the fluctuations in the annual number of human plague cases aggregated across Kazakhstan.

Here, we use the mean of measurements for each season, thereby eliminating smaller-scale spatial variations and measurement errors. The high degree of spatial correlation (3) means that this large scale still retains most of the temporal variation.

The human plague cases are recorded annually and aggregated spatially.

**Next Generation Matrix for the Basic Reproduction Number.** The basic reproduction number  $R_0$ , the expected number of new cases generated by a typical infected individual in a totally susceptible population in a demographic steady state, is defined as the dominant eigenvalue of the so-called next generation matrix for systems with a finite number of different types of infected individuals (details and algorithms are given in ref. 4). The basic reproduction number is a threshold quantity in the natural dynamic sense, meaning that a steady state of a dynamical system changes stability when the value of the quantity passes the threshold. In the rodent–flea–human system, we, in principle, have three types of infected individuals, and the next generation matrix  $M$  is a 3 × 3 matrix. The elements  $m_{ij}$  of  $M$  are defined as the expected number of new cases of type  $i$  caused by an infected individual of type  $j$ . If we number the types as 1 for fleas, 2 for rodents, and 3 for humans, we obtain (Eq. S1)

$$M = \begin{pmatrix} 0 & m_{12} & 0 \\ m_{21} & 0 & 0 \\ m_{31} & m_{32} & m_{33} \end{pmatrix}. \quad [\text{S1}]$$

Here,  $m_{12} = K_F$ , the number of fleas produced by one infected rodent at carrying capacity (where we assume that all fleas on a rodent become infected during the rodent's infectious period) (5). Effectively, this number of fleas contacting a rodent is multiplied by the probability per unit of time that a rodent infects a flea and the average duration of the infectious period in the rodent. Because fleas are assumed to be attached to the rodent for a longer period, we assume, basically, that each flea becomes infected during that time (i.e., that the product of the transmission probability per unit of time and the time period of transmission is one). The element  $m_{21} = (1 - e^{-aK_R})\beta_R \frac{1}{d_F}$  equals the number of rodents infected by one infected flea; it is the product of the probability that a flea successfully finds a rodent

when searching for a host, the transmission rate to rodents, and the average time that the flea is infectious. We have chosen the elements  $m_{13}$  and  $m_{23}$  to be zero, signifying that humans infect neither fleas nor rodents, respectively, consistent with the view that human cases are the result of spillover from the wildlife system but that there is no spillback from humans. Furthermore, we only regard bubonic plague and neglect the pneumonic form (6). Consequently, we assume that  $m_{33} = 0$ , meaning that humans do not directly infect other humans. We have already assumed that fleas do not directly infect other fleas and that rodents do not directly infect other rodents.

The consequence of these reasonable assumptions is that the  $R_0$  for the natural system does not depend on the human host. The dominant eigenvalue of  $M$  is given by (Eq. S2)

$$R_0 = \sqrt{k_{12}k_{21}} = \sqrt{\frac{K_F\beta_R(1 - e^{-aK_R})}{d_F}}. \quad [\text{S2}]$$

This constitutes the threshold quantity for the plague outbreaks in the wildlife system. Note that, as is to be expected, the quantity depends on the rodent and flea population size, the transmission rate (from flea to rodent), and the average length of the infectious period (in fleas). It can also be derived by specifying a full compartmental transmission model, which has indeed been done by Keeling and Gilligan in ref. 7. In the text, we use the derived quantity  $R_{\text{eff}}$ , depending on time and interpreted as the effective reproduction number of the wildlife system, with the fixed carrying capacities  $K_F$  and  $K_R$  replaced by the respective actual population sizes  $B_t$  and  $R_t$  (in the text). In case of a mosquito-borne infection like malaria in humans, the traditional expression for  $R_0$  is also the product of two terms, one number characterizing the number of mosquitoes infected by one human and the other number characterizing the number of humans infected by one mosquito [this finding was introduced by Macdonald (8), and an example is given in the work by Bailey (ref. 9, pp. 94–100)]. This finding arises in the same way from a 2 × 2 next generation matrix having mosquitoes and humans as its types. The expression from Macdonald (8) is actually the square of the  $R_0$  from the next generation matrix, because the generations of vectors and hosts alternate so that taking the expression without the square root actually amounts to looking two generations ahead. Although the mathematical approach is the same, the difference in biology between a mosquito- and flea-based system causes the resulting expressions to be different.

It is clear from the above, however, that this threshold quantity cannot be expected to explain the second epidemiological threshold that we have statistically observed in the analysis of the human cases of plague in Kazakhstan. The elements  $m_{31}$  and  $m_{32}$  are also not likely to be very relevant, because they are based on homogeneous mixing of humans with the wildlife system.

**The Threshold Quantity  $\lambda$ .** One might imagine that, in other time periods than the 1949–1995 period under study, there was a different distribution for the contact parameter  $c$  and hence, a different distribution for  $\lambda$ . For example, in the period before our study period, there was likely to have been more activity of nomadically living people in the region in Kazakhstan (before more fixed agricultural communities became established, usually outside the plague-affected areas). Exposure and contacts are, therefore, likely to have been distributed differently from what we assume here, leading more frequently to a situation, perhaps, where  $\lambda$  is above threshold. Certainly, there were many more

human cases in the period before control. This drop is, of course, influenced (or reasonably caused) by the control measures that were taken after 1949, but there may also be a visible decline in the frequency of outbreaks in humans before that period, coinciding with the change in nomadic activity.

**Statistical Modeling. Seasonal wildlife reservoir model.** We test the significance of the assumption of heteroscedasticity and dependence among observations defined in the structure of the variance–covariance matrix  $\Sigma$ . We find that, when the spring and fall forces of infection are both in the upper regime,  $\Sigma$  is of the form (S3)

$$\Sigma = \begin{pmatrix} G_{t,s} & G_{t,f} & B_{t,s} & B_{t,f} & \mathcal{J}_{t,s} & \mathcal{J}_{t,f} \\ G_{t,s} & \sigma_{G,s}^2 & \rho_G \delta_{G,f} \sigma_{G,s}^2 & 0 & 0 & 0 \\ G_{t,f} & \rho_G \delta_{G,f} \sigma_{G,s}^2 & \delta_{G,f}^2 \sigma_{G,s}^2 & 0 & 0 & 0 \\ B_{t,s} & 0 & 0 & \delta_{B,s}^2 \sigma_{B,f}^2 & 0 & 0 \\ B_{t,f} & 0 & 0 & 0 & \sigma_{B,f}^2 & \rho_{B,\mathcal{J}} \delta_{B,s} \delta_{\mathcal{J},s} \sigma_{B,f}^2 \\ \mathcal{J}_{t,s} & 0 & 0 & \rho_{B,\mathcal{J}} \delta_{B,s} \delta_{\mathcal{J},s} \sigma_{B,f}^2 & 0 & \delta_{\mathcal{J},s}^2 \sigma_{B,f}^2 \\ \mathcal{J}_{t,f} & 0 & 0 & 0 & \rho_{B,\mathcal{J}} \delta_{\mathcal{J},f} \sigma_{B,f}^2 & \delta_{\mathcal{J},f}^2 \sigma_{B,f}^2 \end{pmatrix}, \quad [S3]$$

where if the infectious-flea force in the spring season is in the lower regime, the variance–covariance matrix  $\Sigma$  of the conditional distribution would have dimension reduced by one (i.e., reduced by the number of seasons in the lower regime). Hence, the rodent growth rate model, the flea burden model, and the change in infectious-flea force model have different variances across models and seasons. Moreover, the rodent growth rates are correlated across seasons and uncorrelated with the flea burden and change in infectious-flea force models. The flea burden is correlated with the change in infectious-flea force within each season. The flea burden and the change in infectious-flea force are not correlated across seasons.

The model is fitted using the `gnls` function in the `nlme` package of the R software (10). Fig. 1A summarizes the results of our analysis, where  $R_t^{su}$  is the summer rainfall at time  $t$ . The subscript  $t - 0.5$  refers to the previous season [i.e., if the response is in the spring (fall) of year  $t$ , then  $t - 0.5$  refers to the fall of last year (spring of current year)]. The subscripts  $t - 1$ ,  $t - 1.5$ , and  $t - 2$  are similarly defined. Table 1 summarizes the maximum likelihood estimates of the parameters in the model along with their asymptotic SEs and asymptotic 95% confidence intervals. The plots of the normalized residuals vs. the fitted values in the rodent growth rate model, the flea burden model, and the change in infectious-flea force model reported in Fig. S2A do not indicate any significant heteroscedastic patterns. The normal probability plots of the normalized residuals in Fig. S2B do not show any significant departure from the assumption of normality. The plots of the empirical autocorrelation function, displayed in Fig. S3, indicate that the normalized residuals behave like uncorrelated noise, which was expected under the above correlation model. The observed time series, along with the fitted counterparts, are displayed in Fig. S4 for each of the three models (rodent growth rate, log flea burden, and change in infectious-flea force). Clearly, the fitted values are close to their observed counterparts in each of the three models.

We justify the use of the seasonal threshold model for the wildlife plague data by comparing the deviance of our fitted model with the deviance of a simple multivariate linear model in which

the threshold is removed. The fitted model (i.e., the threshold model with seasonal delay and threshold) is compared with the simple linear multivariate model by assessing the difference in deviance when simulating from the associated smaller model based on a parametric bootstrap size of 1,000. Note that the asymptotic null  $\chi^2$  distribution for comparing changes in deviance may be invalid, because the threshold parameter is absent under the null hypothesis of no threshold effects (11). We find that the observed deviance difference between the simpler model and our fitted seasonal threshold model is 79.94 compared with the bootstrap 95% quantile of the deviance difference given by 12.28. Similarly, our fitted seasonal threshold model is compared

with a model with the same delay and threshold in the spring and fall, where the delay is estimated to be 1.5. We find that the observed deviance difference between our fitted seasonal threshold model and the nonseasonal threshold model is 27.50 compared with the bootstrap 95% quantile of the deviance difference given by 11.42. Hence, our seasonal threshold wildlife reservoir model clearly provides a better fit to the data.

**Human–plague model.** We justify the use of the threshold model for the human plague data by comparing the deviance of our fitted model with the deviance of a simple generalized linear model in which the threshold is removed. We fitted a simple generalized linear model with a log link function to the human plague data. The resulting deviance of the simple generalized linear model without a threshold effect is 135.5. The fitted human plague model [i.e., generalized threshold model (GTM) with a deviance of 60.62] is compared with the simple generalized linear model by assessing the difference in deviance when simulating from the associated smaller model based on a parametric bootstrap size of 1,000. Note that the asymptotic null  $\chi^2$  distribution for comparing changes in deviance may be invalid, because the threshold parameter is absent under the null hypothesis of no threshold effects (11). We find that the observed deviance difference between the simpler model and our human plague GTM is 74.9 compared with the bootstrap 95% quantile of the deviance difference given by 6.91. Hence, our human plague GTM clearly provides a better fit to the human plague data.

To ensure that the threshold variable used in the fitted model, namely the lag-1 minimum of spring and fall average flea density, is a good choice, we fitted the model by considering a number of different threshold variables and assuming the same set of covariates. Table S2 reports the corresponding Akaike Information Criterion (AIC) of each model normalized to account for slight variation in the sample size because of different lag structure. The models considered in Table S2 may not be compared directly with respect to the AIC, because they are based on different number of observations. Therefore, we compare these models in Table S2 by their normalized AIC [normalized AIC (NAIC) = AIC/effective number of observations]. Note that the



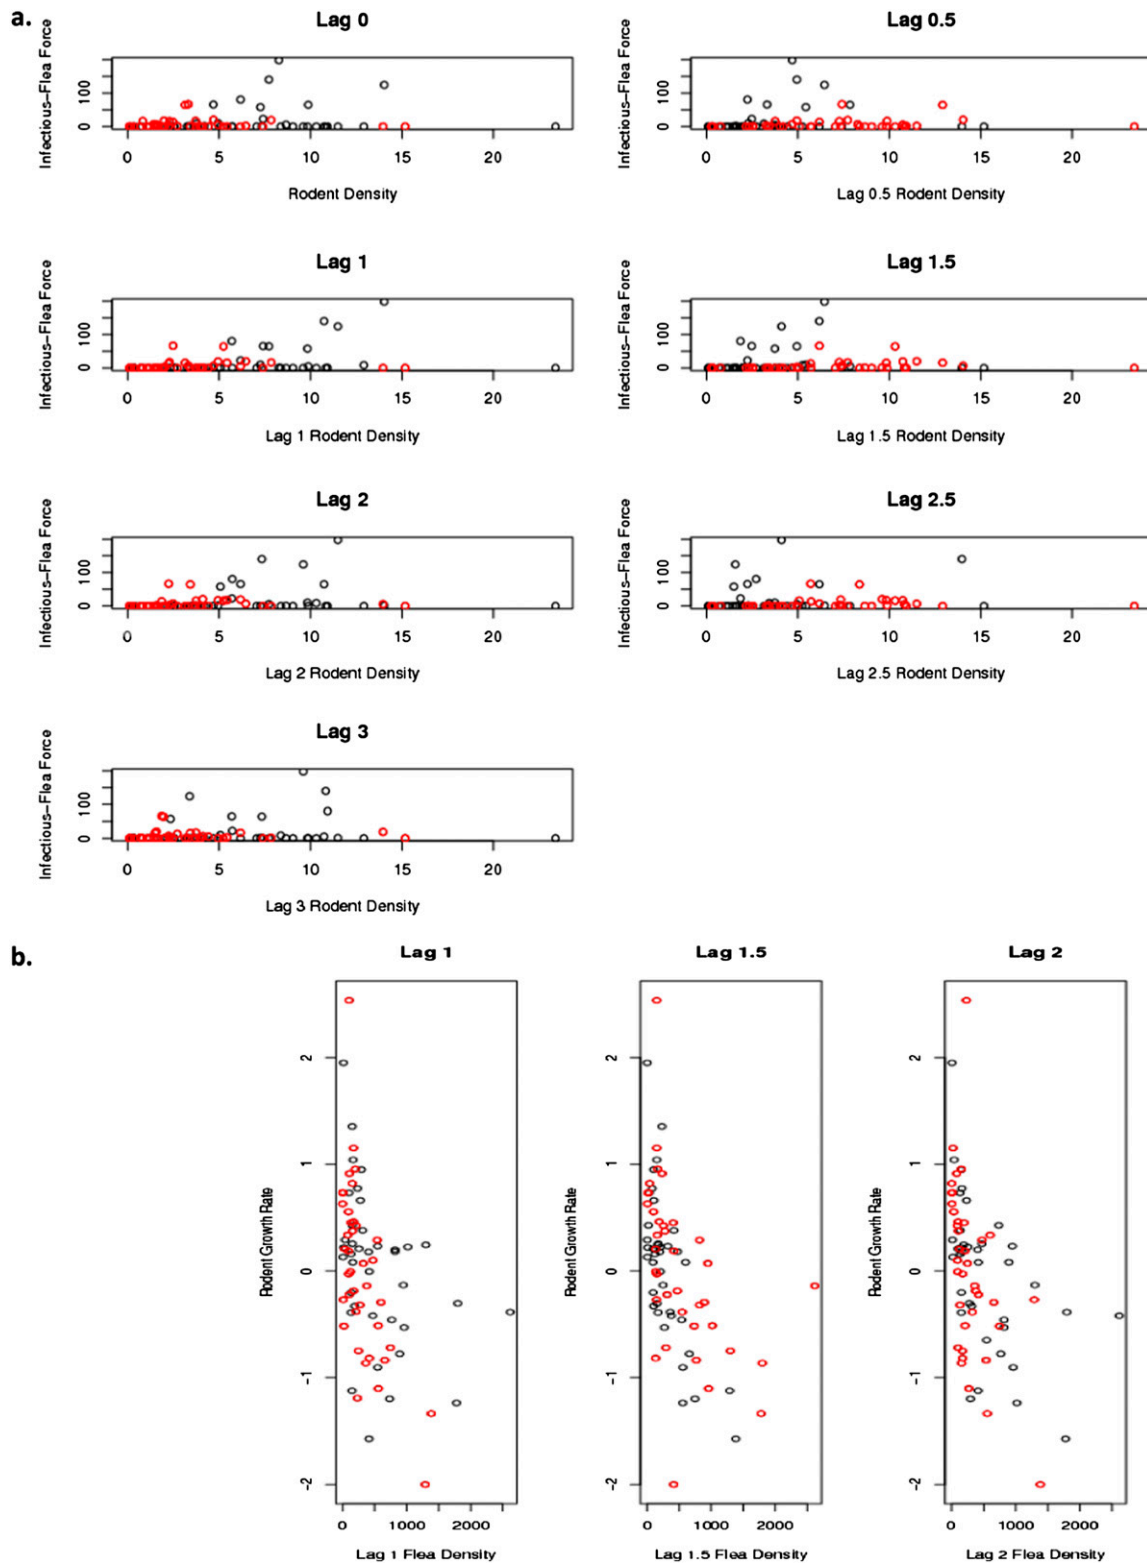

**Fig. S1.** (A) Plots of the infectious-flea force vs. the rodent density at different lags (lag = 0, 0.5, 1.0, 1.5, 2.0, 2.5, and 3.0). The red circles correspond to the spring season, and the black circles correspond to the fall season. (B) Plots of the rodent growth rate vs. the flea density at different lags (lag = 1.0, 1.5, and 2.0). The red circles correspond to the spring season, and the black circles correspond to the fall season.

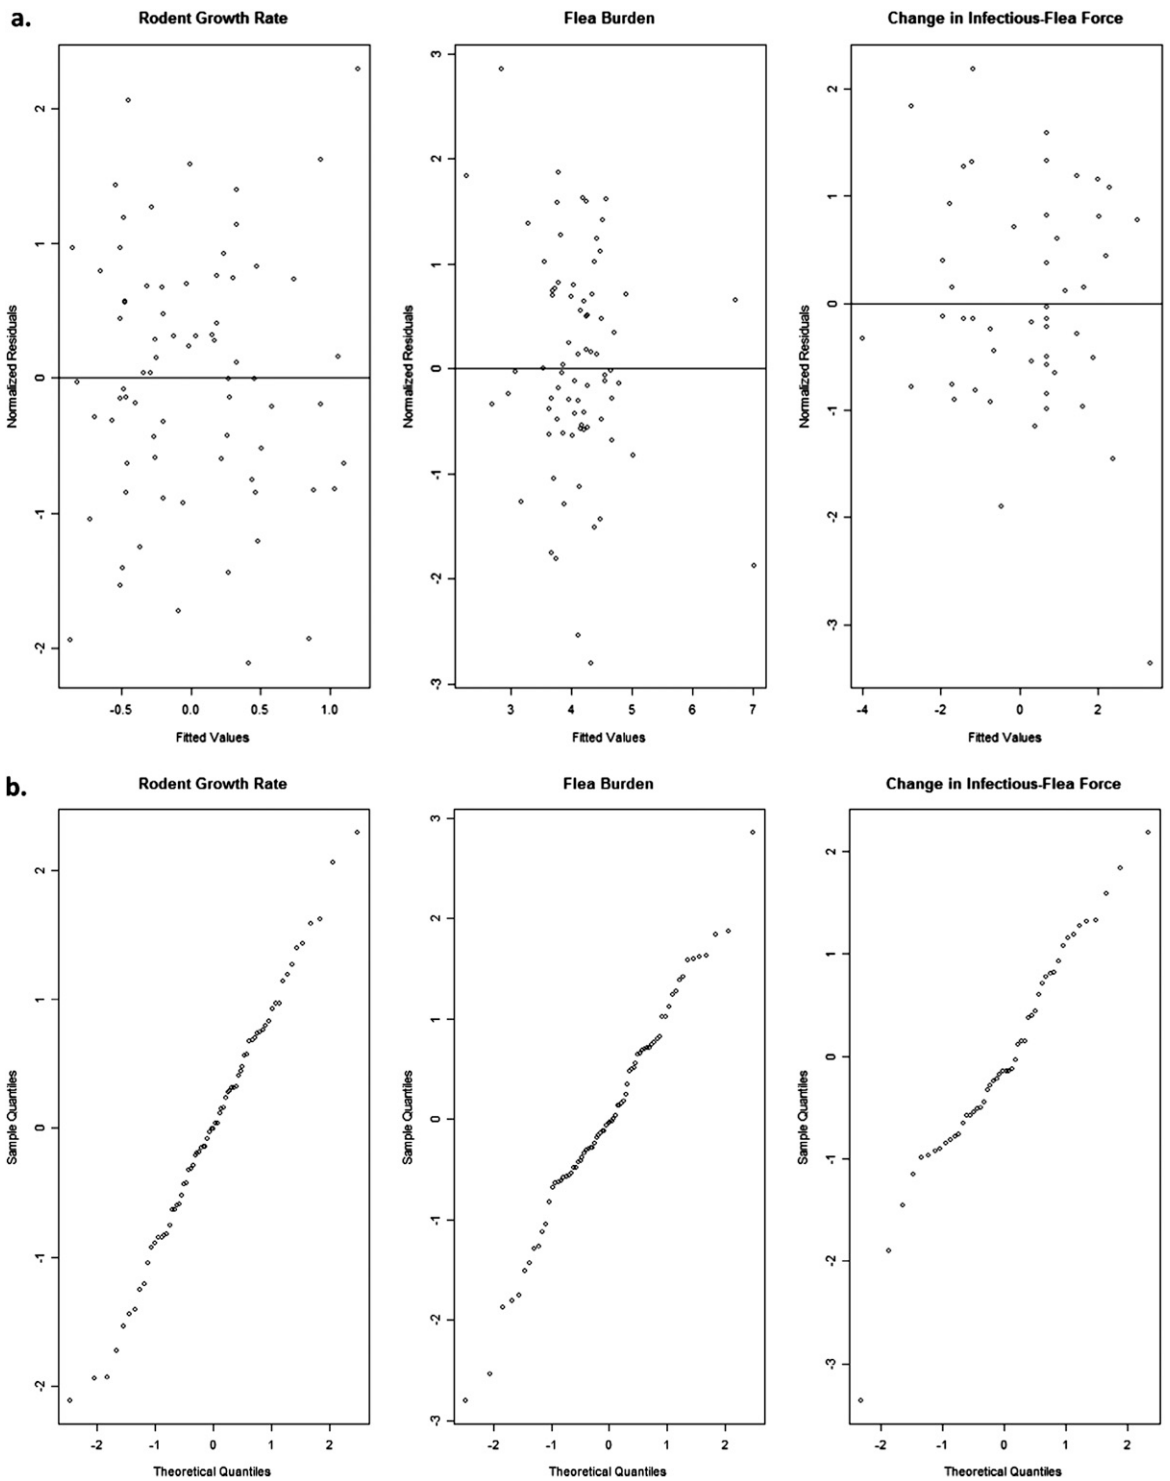

**Fig. S2.** (A) Plots of the normalized residuals vs. the fitted values for the rodent growth rate, the flea burden, and the change in infectious-flea force models. (B) Normal probability plots of the normalized residuals for the rodent growth rate, the flea burden, and the change in infectious-flea force models.





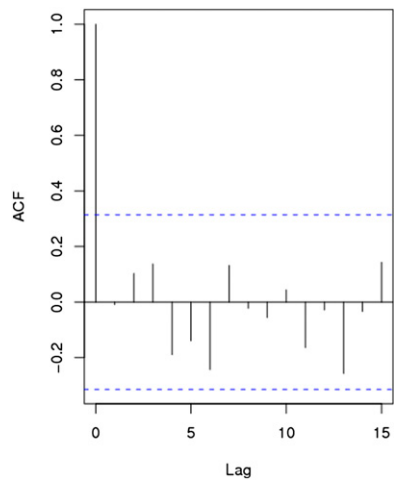

Fig. 55. ACF plot of the standardized residuals for the human plague model.

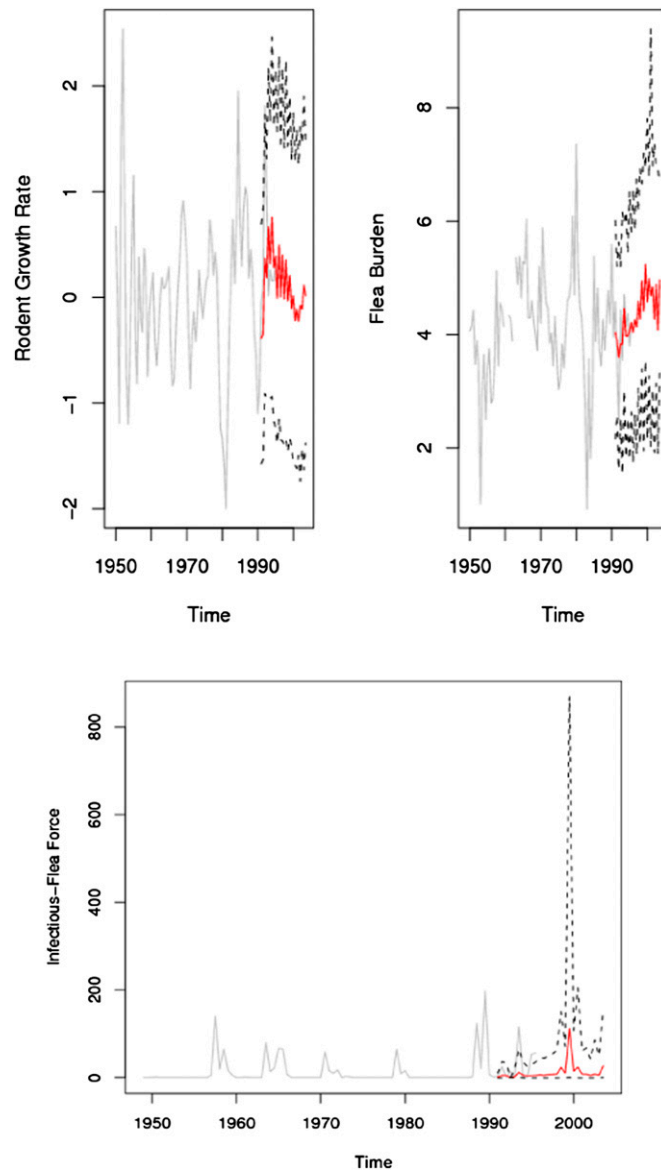

**Fig. 56.** Out of sample point and interval forecasts for the rodent growth rate (*Upper Left*), the (log) flea burden (*Upper Right*), and the infectious-flea force (*Lower*). The forecast origin is the fall season of 1990. The solid black line shows the actual observations, the solid red line shows the point forecasts, and the dashed black lines show the 95% interval forecasts.



**Table S1. Notations and variables used in the full ecoepidemiological model summarized in Figs. 1A and 2A**

| Variable                         | Description                                                                                                                           | Definition                                                                                                                                                                                                      |
|----------------------------------|---------------------------------------------------------------------------------------------------------------------------------------|-----------------------------------------------------------------------------------------------------------------------------------------------------------------------------------------------------------------|
| <b>Seasonal reservoir model</b>  |                                                                                                                                       |                                                                                                                                                                                                                 |
| Sub- and superscripts $s, f$     | Refer to spring and fall seasons, respectively                                                                                        |                                                                                                                                                                                                                 |
| $t - d$                          | Time $t - d$ (e.g., $t - 0.5$ refers to the previous season and $t - 1$ refers to the previous year)                                  |                                                                                                                                                                                                                 |
| $R_t$                            | Rodent density at time $t$                                                                                                            |                                                                                                                                                                                                                 |
| $F_t$                            | Flea density at time $t$                                                                                                              |                                                                                                                                                                                                                 |
| $G_t$                            | Gerbil population yearly growth rate at time $t$                                                                                      | $G_t = \log(R_t/R_{t-1})$                                                                                                                                                                                       |
| $B_t$                            | Flea burden on the log scale at time $t$                                                                                              | $B_t = \log(F_t/R_t)$                                                                                                                                                                                           |
| $I_t$                            | Infectious-flea force at time $t$ (computed as the product of flea density and prevalence of plague in rodents averaged across sites) | If $R_{t-1} < z$ , $I_t$ is a degenerate random variable such that $I_t = 0$ , where $I$ is estimated to be 1.5 y (2 y) if $t$ is spring (fall), and $z$ is estimated to be 3.25 (4.94) if $t$ is spring (fall) |
| $J_t$                            | Change in infectious-flea force at time $t$                                                                                           | $J_t = \log(1 + I_t) - \log(1 + I_{t-1})$                                                                                                                                                                       |
| $R_t^{su}$                       | Summer precipitation at time $t$                                                                                                      | Average amount of rainfall over June, July, and August                                                                                                                                                          |
| <b>Yearly human plague model</b> |                                                                                                                                       |                                                                                                                                                                                                                 |
| $t$                              | Year $t$                                                                                                                              |                                                                                                                                                                                                                 |
| $D_t$                            | Rodent density in year $t$                                                                                                            | Seasonal flea density averaged across all sites and then maximized across seasons                                                                                                                               |
| $f_t$                            | Flea density in year $t$                                                                                                              | Seasonal flea density averaged across all sites and then minimized across seasons (Table S2)                                                                                                                    |
| $H_t$                            | Number of infectious human cases in year $t$                                                                                          |                                                                                                                                                                                                                 |
| $C_t$                            | Flea burden in year $t$                                                                                                               | Ratio of the flea density divided by the rodent density averaged across all sites and then maximized across seasons                                                                                             |
| $i_t$                            | Infectious-flea force in year $t$                                                                                                     | Product of flea density and prevalence of plague in rodents averaged across all sites and then maximized across seasons                                                                                         |
| $T_t^{sp}$                       | Spring temperature in year $t$                                                                                                        | Average monthly temperature over March and April                                                                                                                                                                |
| $T_t^{su}$                       | Summer temperature in year $t$                                                                                                        | Average monthly temperature over June, July, and August                                                                                                                                                         |
| $R_t^{fa}$                       | Fall precipitation in year $t$                                                                                                        | Average amount of precipitation over September, October, and November                                                                                                                                           |

**Table S2. Normalized AIC (NAIC) of models fitted with various threshold values**

| Threshold variable                              | Threshold lag | NAIC | Effective sample size |
|-------------------------------------------------|---------------|------|-----------------------|
| Minimum of spring and fall average flea density | 0             | 4.44 | 38                    |
| Minimum of spring and fall average flea density | 1             | 3.64 | 39                    |
| Minimum of spring and fall average flea density | 2             | 4.69 | 37                    |
| Maximum of spring and fall average flea density | 0             | 4.71 | 38                    |
| Maximum of spring and fall average flea density | 1             | 4.17 | 39                    |
| Maximum of spring and fall average flea density | 2             | 5.08 | 37                    |
| Mean of spring and fall average flea density    | 0             | 4.71 | 38                    |
| Mean of spring and fall average flea density    | 1             | 4.17 | 39                    |
| Mean of spring and fall average flea density    | 2             | 4.87 | 37                    |
